# Supplementary material
Source: PubMed Central journal article supplement (PMC5373101)
Supplement: NIHMS460558-supplement-supplemental.pdf [file NIHMS460558-supplement-supplemental.pdf]

**Supplementary Table 1. Clinicopathological characteristics of ovarian cancer and controls**

| Overall                       |              |               |          |
|-------------------------------|--------------|---------------|----------|
| Variables                     | Case, n(%)   | Control, n(%) | <i>P</i> |
| Age, mean (SD)                | 60.73(10.36) | 60.30(10.71)  | 0.554    |
| Race                          |              |               |          |
| White                         | 339( 81.3)   | 349( 83.7)    | 0.269    |
| Hispanic                      | 48( 11.5)    | 49( 11.8)     |          |
| Others                        | 30( 7.2)     | 19( 4.6)      |          |
| Total                         | 417          | 417           |          |
| White cases*                  |              |               |          |
| Median survival time (months) | 48.26        |               |          |
| Age, median (range)           | 61(26-88)    |               |          |
| Clinical stage                |              |               |          |
| Stage I                       | 16( 5)       |               |          |
| Stage II                      | 21( 7)       |               |          |
| Stage III                     | 202(66)      |               |          |
| Stage IV                      | 65(21)       |               |          |
| Total                         | 304          |               |          |
| Histology                     |              |               |          |
| Serous                        | 197(62)      |               |          |
| Mixed                         | 72(23)       |               |          |
| Others                        | 50(16)       |               |          |
| Total                         | 319          |               |          |
| Death                         |              |               |          |
| No                            | 173(54)      |               |          |
| Yes                           | 146(46)      |               |          |
| Total                         | 319          |               |          |
| Recurrence                    |              |               |          |
| No                            | 167(52)      |               |          |
| Yes                           | 152(48)      |               |          |
| Total                         | 319          |               |          |
| Nonresponder                  |              |               |          |
| No                            | 199(67)      |               |          |
| Yes                           | 96(33)       |               |          |
| Total                         | 295          |               |          |

\* Restricted to patients treated with surgery and platinum-based therapy

**Supplementary Table 2. Haplotype analysis of *GEMIN4* SNPs and ovarian cancer risk**

| Haplotype*    | Case | Control | OR <sup>†</sup> | 95% CI <sup>‡</sup> | P value |
|---------------|------|---------|-----------------|---------------------|---------|
| <i>GEMIN4</i> |      |         |                 |                     |         |
| W_W_W_W_W_W   | 205  | 165     | 1(reference)    |                     |         |
| M_M_W_W_M_M   | 155  | 183     | 0.69            | (0.51-0.94)         | 0.018   |
| M_M_M_W_W_W   | 106  | 142     | 0.63            | (0.46-0.86)         | 0.004   |
| W_W_W_M_W_M   | 112  | 111     | 0.84            | (0.60-1.17)         | 0.304   |
| W_W_W_W_M_W   | 74   | 69      | 0.87            | (0.59-1.30)         | 0.506   |
| Other         | 20   | 18      | 0.91            | (0.46-1.80)         | 0.789   |

\* W- wildtype allele, M- variant allele

† Adjusted for age

‡ Confidence interval

Haplotype in the order of rs2740351 (A/G), rs7813 (A/G), rs2740349 (A/G), rs1062923 (A/G), rs2291778 (C/A), rs3087833 (G/A)

**Supplementary Table 3. Top SNPs in miRNA-related genes associated with ovarian cancer risk and clinical outcome**

| SNP        | Gene    | Association         | Locus | Function                                                                                     | P - value               | q value <sup>‡</sup> |
|------------|---------|---------------------|-------|----------------------------------------------------------------------------------------------|-------------------------|----------------------|
| rs2740351  | GEMIN4  | Susceptibility Risk | 17p13 | Component of miRNP and spliceosome protein complex; required for pre-mRNA splicing           | 0.0014                  | 0.112                |
| rs5973822  | ATG4A   | Susceptibility Risk | Xq22  | Cysteine protease involved in autophagy                                                      | 0.0015                  | 0.112                |
| rs1425486  | PDGFC   | Survival            | 4q32  | Mitogenic factor for mesenchymal cells                                                       | 4.90 X 10 <sup>-5</sup> | 0.004                |
| rs1047920  | SNAI1   | Survival            | 20q13 | Transcription factor involved in epithelial-mesenchymal transition; downregulates E-cadherin | 0.001                   | 0.056                |
| rs7869402  | TLR4    | Survival            | 9q32  | Toll-like receptor that mediates pathogen recognition and innate immunity                    | 0.002                   | 0.063                |
| rs10771184 | KRAS    | Survival            | 12p12 | Kirsten ras oncogene homolog; member of GTPase superfamily                                   | 0.005                   | 0.095                |
| rs12190214 | ALDH5A1 | Treatment Response  | 6p22  | Aldehyde dehydrogenase; non-P450 enzyme metabolism                                           | 0.0062                  | 0.167                |
| rs1425486  | PDGFC   | Treatment Response  | 4q32  | See above                                                                                    | 0.007                   | 0.167                |
| rs7869402  | TLR4    | Treatment Response  | 9q32  | See above                                                                                    | 0.0071                  | 0.167                |

‡ FDR-adjusted P-value

**Supplementary Table 4. Overall and stratified analysis of top 15 SNPs associated with ovarian cancer survival and treatment response**

| No. | SNP        | Model <sup>‡</sup> | Overall Survival  |            |                   |            |
|-----|------------|--------------------|-------------------|------------|-------------------|------------|
|     |            |                    | All patients      |            | Serous carcinoma  |            |
|     |            |                    | HR*(95% CI)       | P smallest | HR*(95% CI)       | P smallest |
| 1   | rs1425486  | Rec                | 2.69( 1.67- 4.33) | 0.00005    | 2.99( 1.73- 5.17) | 0.00009    |
| 2   | rs1047920  | Dom                | 1.96( 1.30- 2.97) | 0.00146    | 1.24( 0.68- 2.25) | 0.47940    |
| 3   | rs7869402  | Dom                | 2.16( 1.31- 3.57) | 0.00248    | 2.24( 1.21- 4.16) | 0.01025    |
| 4   | rs10771184 | Dom                | 0.56( 0.38- 0.84) | 0.00502    | 0.57( 0.32- 1.00) | 0.05181    |
| 5   | rs10518679 | Dom                | 0.57( 0.38- 0.86) | 0.00711    | 0.58( 0.34- 0.97) | 0.03879    |
| 6   | rs3757     | Rec                | 2.76( 1.30- 5.84) | 0.00804    | 2.47( 1.03- 5.91) | 0.04198    |
| 7   | rs3792830  | Dom                | 0.39( 0.19- 0.79) | 0.00864    | 0.39( 0.18- 0.85) | 0.01783    |
| 8   | rs1633445  | Rec                | 2.67( 1.27- 5.64) | 0.00984    | 2.34( 0.99- 5.58) | 0.05381    |
| 9   | rs720014   | Rec                | 2.65( 1.26- 5.59) | 0.01057    | 2.33( 0.98- 5.55) | 0.05597    |
| 10  | rs3087833  | Add                | 1.48( 1.08- 2.03) | 0.01380    | 1.54( 1.02- 2.32) | 0.04010    |
| 11  | rs2287584  | Rec                | 0.39( 0.19- 0.84) | 0.01610    | 0.43( 0.18- 1.02) | 0.05426    |
| 12  | rs9333555  | Dom                | 2.49( 1.18- 5.24) | 0.01627    | 1.81( 0.65- 5.04) | 0.26001    |
| 13  | rs17749202 | Rec                | 1.66( 1.07- 2.58) | 0.02442    | 1.84( 1.07- 3.17) | 0.02846    |
| 14  | rs12889916 | Rec                | 0.42( 0.19- 0.91) | 0.02791    | 0.35( 0.14- 0.87) | 0.02389    |
| 15  | rs8139591  | Rec                | 0.20( 0.05- 0.84) | 0.02840    | 0.17( 0.02- 1.24) | 0.07998    |

| No. | SNP        | Model <sup>‡</sup> | Treatment Response |            |                     |            |
|-----|------------|--------------------|--------------------|------------|---------------------|------------|
|     |            |                    | All patients       |            | Serous carcinoma    |            |
|     |            |                    | OR*(95% CI)        | P smallest | OR*(95% CI)         | P smallest |
| 1   | rs12190214 | Dom                | 2.60( 1.31- 5.14)  | 0.00619    | 2.65( 1.19- 5.92)   | 0.01749    |
| 2   | rs1425486  | Rec                | 3.38( 1.39- 8.19)  | 0.00703    | 3.40( 1.25- 9.23)   | 0.01643    |
| 3   | rs7869402  | Dom                | 3.49( 1.41- 8.67)  | 0.00705    | 2.78( 0.93- 8.33)   | 0.06801    |
| 4   | rs2248718  | Dom                | 2.12( 1.19- 3.78)  | 0.01089    | 2.66( 1.25- 5.68)   | 0.01151    |
| 5   | rs12226697 | Dom                | 3.30( 1.29- 8.45)  | 0.01278    | 4.89( 1.53-15.62)   | 0.00736    |
| 6   | rs17408716 | Dom                | 0.38( 0.17- 0.84)  | 0.01658    | 0.50( 0.20- 1.27)   | 0.14614    |
| 7   | rs713065   | Rec                | 2.28( 1.15- 4.53)  | 0.01893    | 1.81( 0.80- 4.11)   | 0.15519    |
| 8   | rs16869269 | Rec                | 7.67( 1.36-43.16)  | 0.02090    | #                   | -          |
| 9   | rs7695605  | Dom                | 1.85( 1.09- 3.13)  | 0.02165    | 2.09( 1.08- 4.07)   | 0.02895    |
| 10  | rs10900596 | Rec                | 0.31( 0.11- 0.85)  | 0.02327    | 0.27( 0.07- 1.00)   | 0.05044    |
| 11  | rs10771184 | Dom                | 0.50( 0.27- 0.91)  | 0.02385    | 0.70( 0.31- 1.56)   | 0.38396    |
| 12  | rs12900401 | Dom                | 2.68( 1.13- 6.34)  | 0.02504    | 1.61( 0.50- 5.26)   | 0.42663    |
| 13  | rs8065843  | Rec                | 4.47( 1.17-17.02)  | 0.02839    | 12.04( 1.35-107.56) | 0.02593    |
| 14  | rs7957     | Dom                | 1.75( 1.03- 2.97)  | 0.03741    | 1.90( 0.98- 3.68)   | 0.05597    |
| 15  | rs1048691  | Rec                | 0.11( 0.01- 0.90)  | 0.03916    | #                   | -          |

\* Adjusted for age, clinical stage, histology, and treatment regimen; CI- confidence interval

‡ Rec- recessive, Dom- dominant, Add- additive

# Number of subjects with variant alleles too small for meaningful estimation

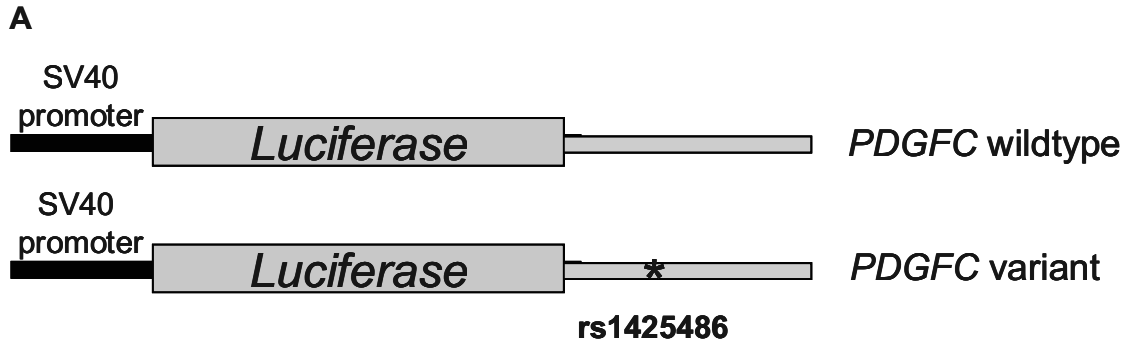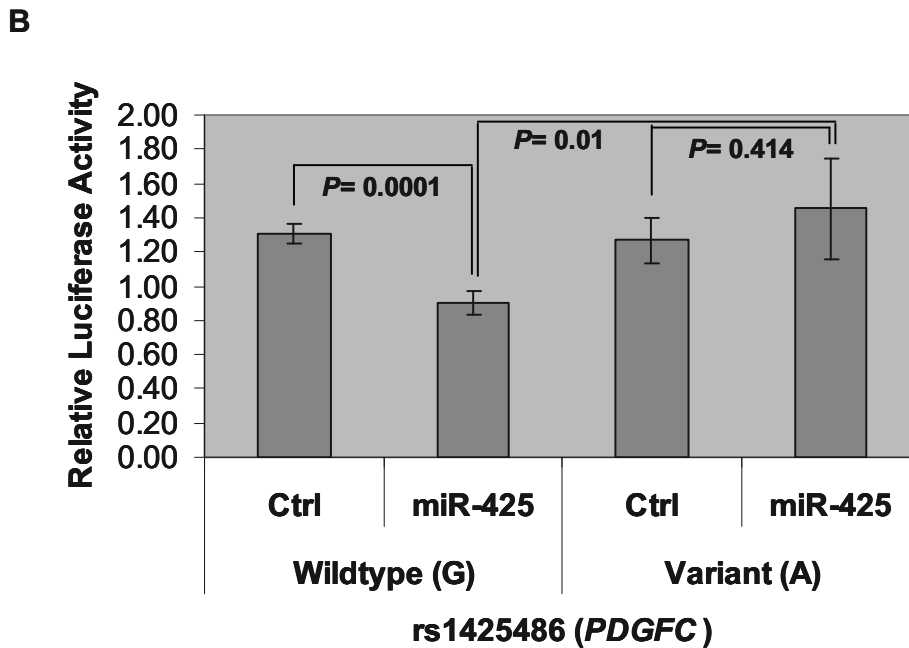

**Supplementary Figure 1.** Effect of the *PDGFC* variant allele on miR-425 targeting and luciferase reporter expression. *A*, schematic diagram of the luciferase reporter construct containing the entire *PDGFC* 3'UTR, including the wildtype or variant allele of rs1425486. *B*, relative luciferase reporter activity of the wildtype and variant *PDGFC* allele in the presence of control (Ctrl) or miR-425 RNA in OVCAR3 cells. Similar results were obtained with four replicates. *P* values were determined by two-sided Student's t-test.
